# Supplementary material
Source: publisher site journal article supplement (https://www.dovepress.com/article/580043)
Supplement: Supplementary file 1 [file 580043%20Revised%20Supplementary%20table.docx]

**Supplementary Table S1: Comparison of ACOG and HSE antimicrobial prescribing recommendations for common infections during pregnancy**

| **Infection type** | **Guideline** | **First-line recommended agents** | **Alternative agents (penicillin allergy/intolerance)** | **Agents to avoid** | **Key trimester-specific notes** |
| --- | --- | --- | --- | --- | --- |
| UTI | ACOG | Nitrofurantoin*, Amoxicillin, Cephalexin | Fosfomycin | Fluoroquinolones, Tetracyclines | *Avoid nitrofurantoin at term (38–42 weeks) if possible |
| HSE | Nitrofurantoin*, Amoxicillin, Cephalexin | Fosfomycin | Trimethoprim (1st trimester), Fluoroquinolones | *Avoid near delivery; check renal function |
| Respiratory tract infection | ACOG | Amoxicillin, Amoxicillin-clavulanate | Azithromycin, Erythromycin | Fluoroquinolones, Tetracyclines | Macrolides preferred in penicillin allergy |
| HSE | Amoxicillin | Azithromycin | Fluoroquinolones, Tetracyclines | Avoid antibiotics for viral infections |
| Bacterial vaginosis | ACOG | Metronidazole (oral or vaginal) | Clindamycin (oral or vaginal) | - | Safe in all trimesters when indicated |
| HSE | Metronidazole (oral or vaginal) | Clindamycin | - | Treatment recommended if symptomatic |
| Gastrointestinal infection | ACOG | Supportive care ± Amoxicillin (if bacterial) | Azithromycin | Fluoroquinolones | Antibiotics only if bacterial etiology suspected |
| HSE | Supportive care | Azithromycin | Fluoroquinolones | Emphasis on hydration and symptom control |
| Skin and soft tissue infection | ACOG | Cephalexin, Amoxicillin-clavulanate | Clindamycin | Tetracyclines | Consider MRSA risk |
| HSE | Flucloxacillin, Cephalexin | Clindamycin | Tetracyclines | Adjust based on severity |
| Intra-amniotic infection† | ACOG | Ampicillin + Gentamicin | - | - | Typically requires inpatient management |
| HSE | Ampicillin + Gentamicin | - | - | Not routinely managed outpatient |

†Included for guideline comparison only; although intra-amniotic infections are typically managed in inpatient settings, a small number of outpatient prescriptions were identified and assessed for guideline concordance.
